# Supplementary material for: The effectiveness of art therapy for anxiety in adults: A systematic review of randomised and non-randomised controlled trials
Source: PubMed Central journal article supplement (PMC6296656; doi:10.1371/journal.pone.0208716), 2018-12-17
Supplement: pone.0208716.s003.pdf [file pone.0208716.s003.pdf]

**Risk of Bias**

| Authors | Title | Journal | Year | Protocol registration | Declaration of interest | Funding sources | Selection bias | Performance bias | Detection bias | Attrition bias | Reporting bias |
|---------|-------|---------|------|-----------------------|-------------------------|-----------------|----------------|------------------|----------------|----------------|----------------|
|         |       |         |      |                       |                         |                 |                |                  |                |                |                |

**Characteristics (1)**

| Authors | Title | Journal | Year | Aim of the study | Study type (RCT/nRCT) | Study population (based on inclusion/exclusion criteria, total number of participants) | Number of treated subjects | Number of controlled subjects |
|---------|-------|---------|------|------------------|-----------------------|----------------------------------------------------------------------------------------|----------------------------|-------------------------------|
|         |       |         |      |                  |                       |                                                                                        |                            |                               |

**Characteristics (2)**

| Art therapy description | Duration, frequency, type (group or individual) | Individualized or protocolled treatment | Co-interventions | Control description | Outcome domains | Outcome measures (instruments) |
|-------------------------|-------------------------------------------------|-----------------------------------------|------------------|---------------------|-----------------|--------------------------------|
|                         |                                                 |                                         |                  |                     |                 |                                |

**Characteristics (3)**

| Results: anxiety symptoms | Results: quality of life | Results: psychotropic use | Results: comorbid depression (symptoms) | Perceived workings mechanism | Method of data analysis (statistics) | Authors' conclusions /summary | Reviewer opinion |
|---------------------------|--------------------------|---------------------------|-----------------------------------------|------------------------------|--------------------------------------|-------------------------------|------------------|
|                           |                          |                           |                                         |                              |                                      |                               |                  |
