# Supplementary material for: The effectiveness of art therapy for anxiety in adults: A systematic review of randomised and non-randomised controlled trials
Source: PLOS journal article supplement (doi:10.1371/journal.pone.0208716), 2018-12-17
Supplement: S4 (10.1371/journal.pone.0208716.s004) [file journal.pone.0208716.s004]

## Excluded studies with reasons for exclusion

| Authors                                                                                | Title                                                                                                                                                 | Journal                                                                       | Published | Reason for exclusion                                                             |
|----------------------------------------------------------------------------------------|-------------------------------------------------------------------------------------------------------------------------------------------------------|-------------------------------------------------------------------------------|-----------|----------------------------------------------------------------------------------|
| Allen KN, Wozniak, DF                                                                  | The language of healing: Women's voices in healing and recovering from domestic violence                                                              | Social Work in Mental Health                                                  | 2011      | no control group                                                                 |
| Asawa P, Pateracki E                                                                   | Reducing anxiety to technology: Utilizing expressive experiential interventions                                                                       | Dissertation Abstracts International: Section B: The Sciences and Engineering | 2004      | dissertation, no peer reviewd publication                                        |
| Campbell M, Decker K, Kruk K, Deaver, S                                                | Art therapy and cognitive processing therapy for combat-related PTSD: A randomized controlled trial                                                   | Art Therapy                                                                   | 2016      | only PTSD (no anxiety symptoms measured)                                         |
| Curry NA, Kasser T                                                                     | Can coloring mandalas reduce anxiety?                                                                                                                 | Art Therapy                                                                   | 2005      | anxiety induction                                                                |
| de Morais AAH, Dalecio MAN, Vizmann A, Bueno,VLRD, Roecker S, Salvagioni, DAJ, Eler GJ | Effect on scores of depression and anxiety in psychiatric patients after clay work in a day hospital                                                  | Arts in Psychotherapy                                                         | 2014      | not only anxiety; no pre test                                                    |
| Eaton J, Tieber C                                                                      | The effects of coloring on anxiety, mood, and perseverance                                                                                            | Art Therapy                                                                   | 2017      | healthy population                                                               |
| Heynen E, Roest J, Willemars G, van Hooren S                                           | Therapeutic alliance is a factor of change in arts therapies and psychomotor therapy with adults who have mental health problems                      | Arts in Psychotherapy                                                         | 2017      | no control group                                                                 |
| Kim SK                                                                                 | A randomized, controlled study of the effects of art therapy on older Korean-Americans' healthy aging                                                 | Arts in Psychotherapy                                                         | 2013      | elderly                                                                          |
| Kimport E, Hartzell E                                                                  | Clay and anxiety reduction: A one-group, pretest/posttest design with patients on a psychiatric unit                                                  | Art Therapy                                                                   | 2015      | no control group                                                                 |
| Lande RG, Banks, Williams L., Francis JL, Gagnani C, Morin ML                          | Characteristics and effectiveness of an intensive military outpatient treatment program for PTSD                                                      | Journal of Aggression, Maltreatment and Trauma                                | 2011      | no control group                                                                 |
| Selders M, Visser R, van Rooij W, Delfstra G, Koelen JA                                | The development of a brief group intervention (Dynamic Interpersonal Therapy) for patients with medically unexplained somatic symptoms: a pilot study | Psychoanalytic Psychotherapy                                                  | 2015      | AT was small part of large multidisciplinary treatment, no effect measures of AT |
| Swami V                                                                                | Sketching people: Prospective investigations of the impact of life drawing on body image                                                              | Body Image                                                                    | 2017      | no primary anxiety (negative body image)                                         |
| Toroghi LM                                                                             | The Effectiveness of Art Therapy On Housewives General Health, Anxiety and Self-efficacy in Tehran                                                    | European Psychiatry                                                           | 2015      | poster, no peer reviewed publication                                             |

## Excluded studies with reasons for exclusion – from reference lists of systematic reviews

| Authors                                                 | Title                                                                                                                                                 | Journal                                                 | Published | Reason for exclusion                                                                                                   |
|---------------------------------------------------------|-------------------------------------------------------------------------------------------------------------------------------------------------------|---------------------------------------------------------|-----------|------------------------------------------------------------------------------------------------------------------------|
| Andersson G, Paxling B, Roch-Norlund P et al.           | Internet-based psychodynamic versus cognitive behavioral guided self-help for generalized anxiety disorder: a randomized controlled trial.            | Psychosom 2012;81:344-55.                               | 2012      | no art therapy                                                                                                         |
| Bell, C.E., & Robbins, S.J.                             | Effect of art production on negative mood: A randomized, controlled trial.                                                                            | Art Therapy, 24(2), 71-75.                              | 2007      | induced worry in healthy population                                                                                    |
| Droždek B., Bolwerk N. (2010a).                         | Evaluation of Group Therapy With Traumatized Asylum Seekers and Refugees—The Den Bosch Model.                                                         | Traumatology, 16, 117–127. doi:10.1177/1534765610388298 | 2010      | adults up to 70 years (>65). PTSD, and art therapy is part of a multidisciplinary treatment and not separately tested. |
| Droždek B., Bolwerk N., Tol W. A., Kleber R. J. (2012). | Group therapy with male asylum seekers and refugees with PTSD: A controlled comparison cohort study of three day-treatment programs.                  | Journal of Nervous and Mental Disease, 200, 758–765.    | 2012      | adults up to 70 years (>65). PTSD, and art therapy is part of a multidisciplinary treatment and not separately tested. |
| Egger N, Konnopka A, Beutel ME et al.                   | Short-term cost-effectiveness of psychodynamic therapy and cognitive-behavioral therapy in social anxiety disorder: results from the SOPHO-NET trial. | J Affect Disord 2015;180:21-8.                          | 2015      | no art therapy                                                                                                         |
| Knijnik DZ, Salum GA, Jr., Blanco C et al.              | Defense style changes with the addition of psychodynamic group therapy to clonazepam in social anxiety disorder.                                      | J Nerv Ment Dis 2009;197:547-51.                        | 2009      | no art therapy                                                                                                         |
| Leichsenring F, Salzer S, Beutel ME et al.              | Psychodynamic therapy and cognitive-behavioral therapy in social anxiety disorder: a multicenter randomized controlled trial.                         | Am J Psychiatry 2013;170:759-67.                        | 2013      | no art therapy                                                                                                         |
| Leichsenring F, Salzer S, Beutel ME et al.              | Long-term outcome of psychodynamic therapy and cognitive-behavioral therapy in social anxiety disorder.                                               | Am J Psychiatry 2014;171:1074-82.                       | 2014      | no art therapy                                                                                                         |
| Leichsenring F, Salzer S, Jaeger U et al.               | Short-term psychodynamic psychotherapy and cognitive-behavioral therapy in generalized anxiety disorder: a randomized, controlled trial.              | Am J Psychiatry 2009;166:875-81.                        | 2009      | no art therapy                                                                                                         |
